# Supplementary material for: Ag0.1-Pd0.9/rGO: an efficient catalyst for hydrogen generation from formic acid/sodium formate
Source: Royal Society of Chemistry journal article supplement (doi:10.1039/c3ta12724a), 2013-01-01
Supplement: c3ta12724a.pdf [file c3ta12724a.pdf]

**New version uploaded 19th December 2013**

## **Supporting Information**

### **Ag<sub>0.1</sub>Pd<sub>0.9</sub>/rGO: An Efficient Catalyst for Hydrogen Generation from Formic Acid/Sodium Formate**

*Yun Ping, Jun-Min Yan\*, Zhi-Li Wang, Hong-Li Wang, Qing Jiang*

Key Laboratory of Automobile Materials, Ministry of Education, Department of Materials Science and Engineering,

Jilin University, Changchun 130022, China

#### **Chemicals**

Vulcan XC-72 carbon (C, 500m<sup>2</sup>/g, Sinopharm Chemical Reagent Co., Ltd), sulfuric acid (H<sub>2</sub>SO<sub>4</sub>, Beijing Chemical Works, 98%), potassium permanganate (KMnO<sub>4</sub>, Sinopharm Chemical Reagent Co., Ltd, ≥99%), potassium peroxodisulfate (K<sub>2</sub>S<sub>2</sub>O<sub>8</sub>, Beijing Chemical Works, ≥99%), phosphorus pentoxide (P<sub>2</sub>O<sub>5</sub>, Beijing Chemical Works, ≥99.99%) hydrogenperoxide (H<sub>2</sub>O<sub>2</sub>, Beijing Chemical Works, 30%), hydrochloric acid (HCl, Beijing Chemical Works, 36%~37%), silver nitrate (AgNO<sub>3</sub>, Beijing Chemical Works, 99.8%), palladium (II) chloride (PdCl<sub>2</sub>, Sinopharm Chemical Reagent Co., Ltd, Pd >59%), sodium chloride (NaCl, Sinopharm Chemical Reagent Co., Ltd, >99.5%), sodium borohydride (NaBH<sub>4</sub>, Sinopharm Chemical Reagent Co., Ltd, 96%), formic acid (HCOOH, FA, Sigma-Aldrich, 96%), and sodium formate dehydrate (HCOONa·2H<sub>2</sub>O, Sinopharm Chemical Reagent Co., Ltd, 99.5%) were used without purification. De-ionized water with the specific resistance of 18.2 MΩ·cm was obtained by reversed osmosis followed by ion-exchange and filtration.

#### **Physical characterizations**

Powder X-ray diffraction (XRD) was performed on a Rigaku RINT-2000 X-ray diffractometer

with Cu K $\alpha$ . Transmission electron microscope (TEM, Tecnai F20, Philips) was applied for the detailed microstructure and composition analyses, and the amorphous carbon coated copper grids were used as the sample supporters. X-ray photoelectron spectrometry (XPS) was carried out on an ESCALABMKLL X-ray photoelectron spectrometer using an Al K $\alpha$  source. Detailed analyses for CO<sub>2</sub>, H<sub>2</sub> and CO were performed on GC-7900 with thermal conductivity detector (TCD) and flame ionization detector (FID)-Methanator (detection limit: ~10 ppm). UV-vis absorption spectra were recorded on an Agilent Cary 50 spectrophotometer in the wavelength range of 200–800 nm.

### **Synthesis of graphene oxide (GO)**

Graphene oxide was prepared according to a modified Hummer's method.<sup>S1, S2</sup> Briefly, graphite powder (3 g, 325 mesh) was put into a 323 K solution of concentrated H<sub>2</sub>SO<sub>4</sub> (12 mL), K<sub>2</sub>S<sub>2</sub>O<sub>8</sub> (2.5 g), and P<sub>2</sub>O<sub>5</sub> (2.5 g). After keeping at 323 K for 4.5 h using a hotplate, the mixture was cooled to room temperature and diluted with 0.5 L of de-ionized water. Then, the mixture was filtered and washed with water using a 0.2 micron Nylon Millipore filter to remove the residual acid. Next, the pretreated graphite powder was put into cold (273 K) concentrated H<sub>2</sub>SO<sub>4</sub> (120 mL) in a 250 mL round-bottom flask equipped with a magnetic stir bar. 15 g KMnO<sub>4</sub> was added gradually under stirring while the temperature of the mixture was kept below 293 K. The solution was then stirred at 308 K for 2 h. Afterwards, 250 mL of de-ionized water was added and the suspension was stirred for another 2 h. Subsequently, additional 0.7 L of de-ionized water was added. Shortly after that, 20 mL of 30% H<sub>2</sub>O<sub>2</sub> was added to the mixture to destroy the excess of permanganate. The suspension was then repeatedly centrifuged and washed firstly with 5% HCl solution and then with water. Exfoliation of graphite oxide to GO was achieved by ultrasonication of the dispersion for 40 min.

### **Syntheses of catalysts**

Firstly,  $\text{Na}_2\text{PdCl}_4$  aqueous solution was prepared by dissolving the salts of  $\text{PdCl}_2$  (1.0 g) and  $\text{NaCl}$  (0.65 g) into 50 mL of water with magnetic stirring for 10 h at room temperature (298 K).

Catalysts of  $\text{AgPd/rGO}$  with different molar ratio of  $\text{Ag}:\text{Pd}$  were synthesized through a surfactant-free coreduction method at 298 K. Typically, for preparation of  $\text{Ag}_{0.1}\text{Pd}_{0.9}/\text{rGO}$ , 3 mL of GO is firstly dispersed in 10.0 mL of water with sonication for 40 min to get the well dispersed GO suspension. And then, 5.0 mL of aqueous solution containing  $\text{AgNO}_3$  (0.01 mmol) and  $\text{Na}_2\text{PdCl}_4$  (0.09 mmol) is mixed with the 10.0 mL of aqueous solution containing the well-dispersed GO under stirring to mix uniformity for 30 min. The fresh  $\text{NaBH}_4$  aqueous solution (1.05 M, 1.0 mL) was added into the above mixture with magnetic stirring (600 r/min). After 2 h, the product was separated by centrifugation, washed with de-ionized water for several times to remove the unreacted  $\text{NaBH}_4$ . Then, the product of  $\text{Ag}_{0.1}\text{Pd}_{0.9}/\text{rGO}$  is obtained and ready for the catalytic  $\text{H}_2$  generation from FA aqueous solution at 298 K.

### **$\text{H}_2$ generation from FA/SF aqueous solution**

Typically, the as-prepared  $\text{Ag}_{0.1}\text{Pd}_{0.9}/\text{rGO}$  re-dispersed in 10 mL of water was kept in a two-necked round-bottom flask. One neck was connected to a gas burette, and the other was connected to a pressure-equalization funnel to introduce formic acid/sodium formate (FA/SF) aqueous solution (1 M/0.67 M, 5 mL). The catalytic reaction was begun once the FA/SF solution was added into the flask with magnetic stirring (600 r/min). The evolution of gas was monitored using the gas burette. The reaction was carried out at 298 K under ambient atmosphere. The catalytic activities of other catalysts for FA decomposition were also applied as the above method. The molar ratios of metal:FA ( $n_{\text{AgPd}}/n_{\text{FA}}$ ) for all the catalytic reactions were kept as a constant of 0.02.

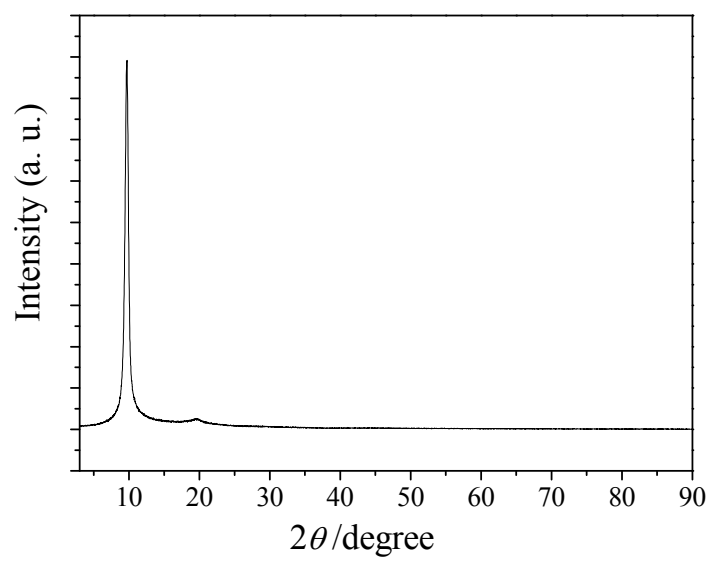

**Figure S1.** XRD pattern of GO.

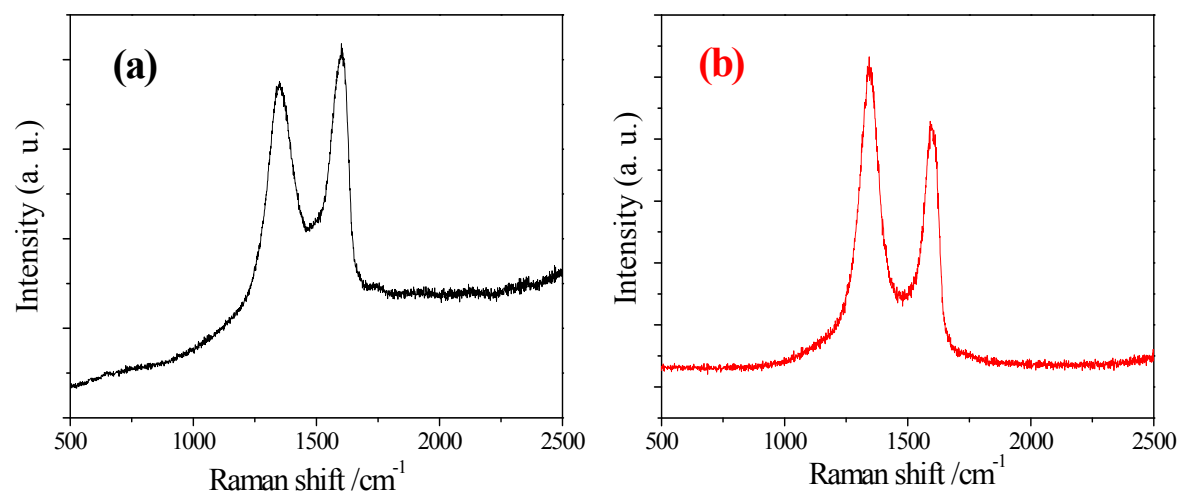

**Figure S2.** Raman spectral profile of (a) GO and (b) Ag<sub>0.1</sub>Pd<sub>0.9</sub>/rGO.

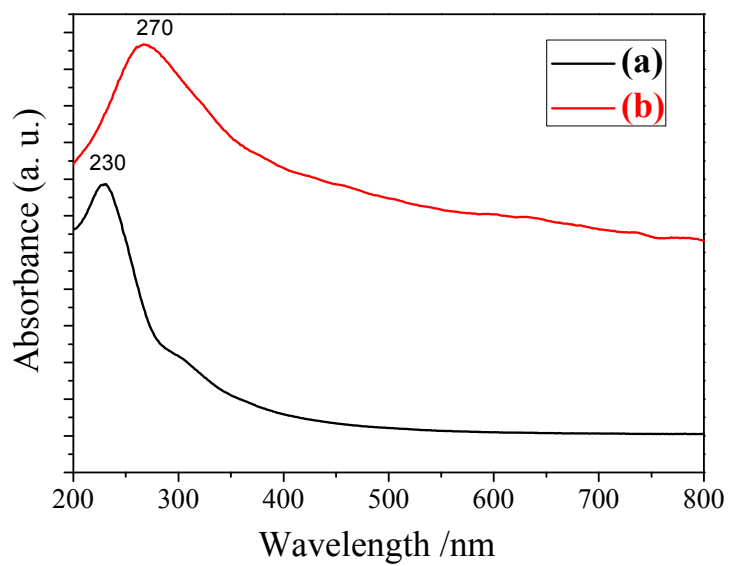

**Figure S3.** UV-vis spectra of (a) GO and (b)  $\text{Ag}_{0.1}\text{Pd}_{0.9}/\text{rGO}$ .

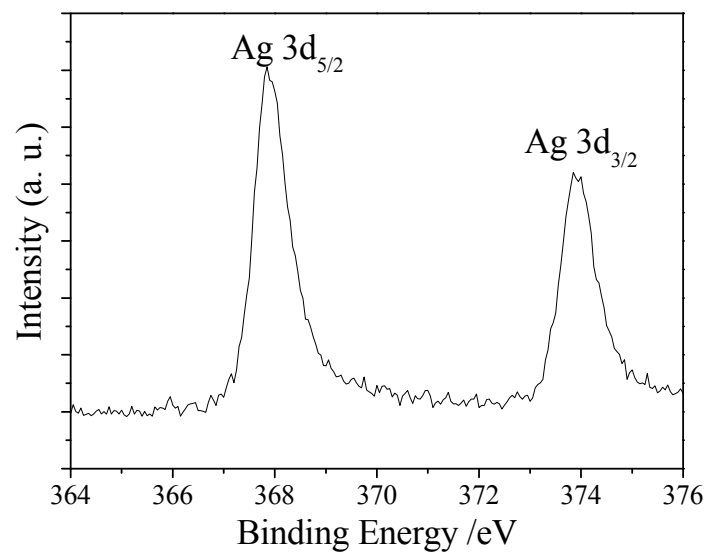

**Figure S4.** XPS spectra of Ag 3d for Ag<sub>0.1</sub>Pd<sub>0.9</sub>/rGO.

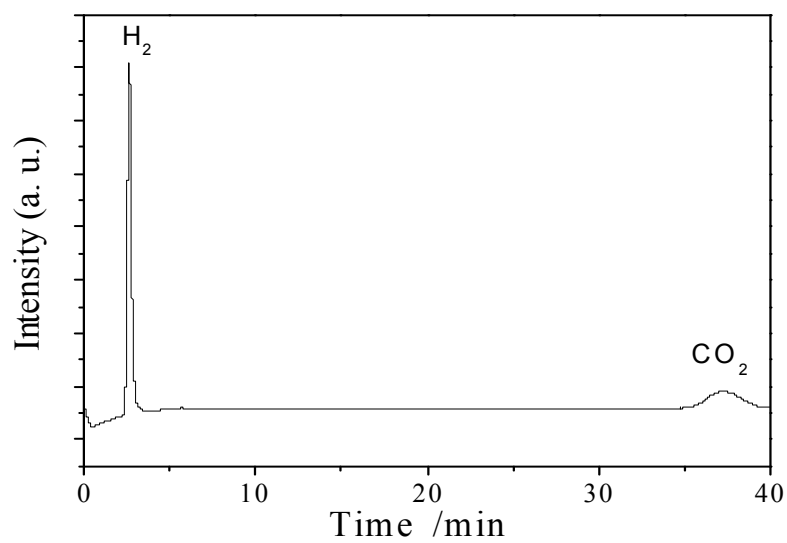

**Figure S5.** GC spectrum using TCD for the evolved gas from FA/SF system (1 M/0.67 M, 5 mL) over Ag<sub>0.1</sub>Pd<sub>0.9</sub>/rGO at 298 K.



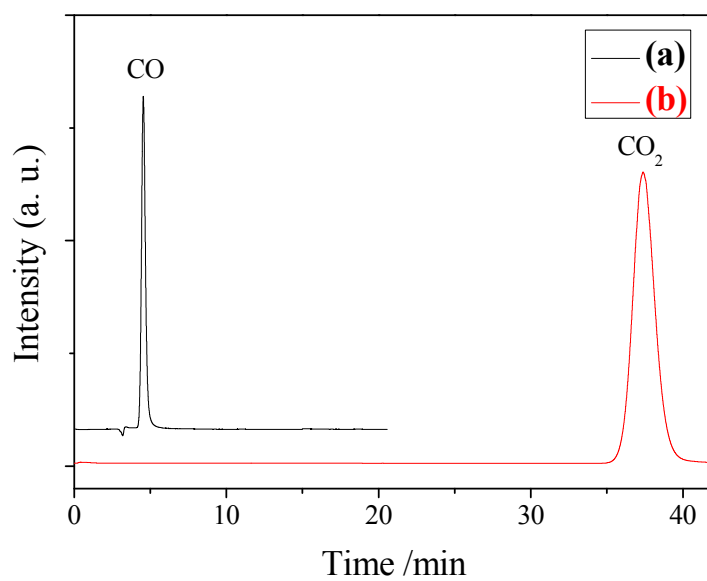

**Figure S6.** GC spectrum using FID-Methanator for (a) commercial pure CO, and (b) the evolved gas from FA/SF (1 M/0.67 M, 5 ml) over Ag<sub>0.1</sub>Pd<sub>0.9</sub>/rGO ( $n_{AgPd}/n_{FA} = 0.02$ ) at 298 K.

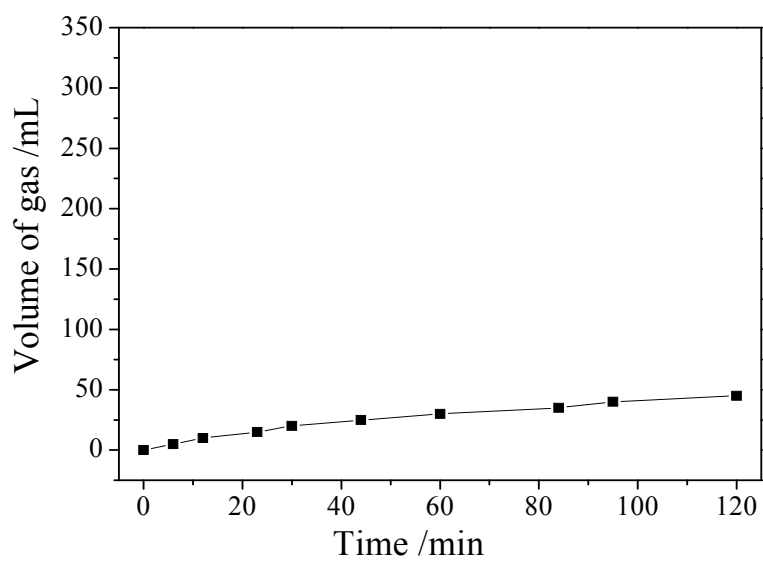

**Figure S7.** Gas generation by the decomposition of aqueous solution of FA/SF (1 M/0.67 M, 5 ml) vs time in the presence of physical mixture of  $\text{Ag}_{0.1}\text{Pd}_{0.9}$  and rGO ( $n_{\text{AgPd}}/n_{\text{FA}} = 0.02$ ) at 298 K under ambient atmosphere.

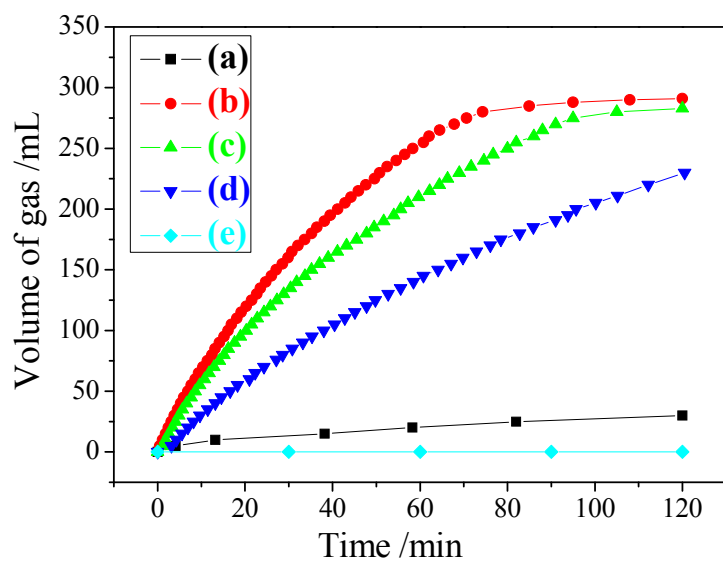

**Figure S8.** Gas generation by decomposition of FA/SF(1 M/0.33 M, 5 ml) with different ratios of Ag/Pd supported on rGO vs time (a) Pd/rGO, (b) Ag<sub>0.1</sub>Pd<sub>0.9</sub>/rGO, (c) Ag<sub>0.2</sub>Pd<sub>0.8</sub>/rGO, (d) Ag<sub>0.5</sub>Pd<sub>0.5</sub>/rGO, (e) Ag/rGO ( $n_{AgPd}/n_{FA} = 0.02$ ) at 298 K under ambient atmosphere.

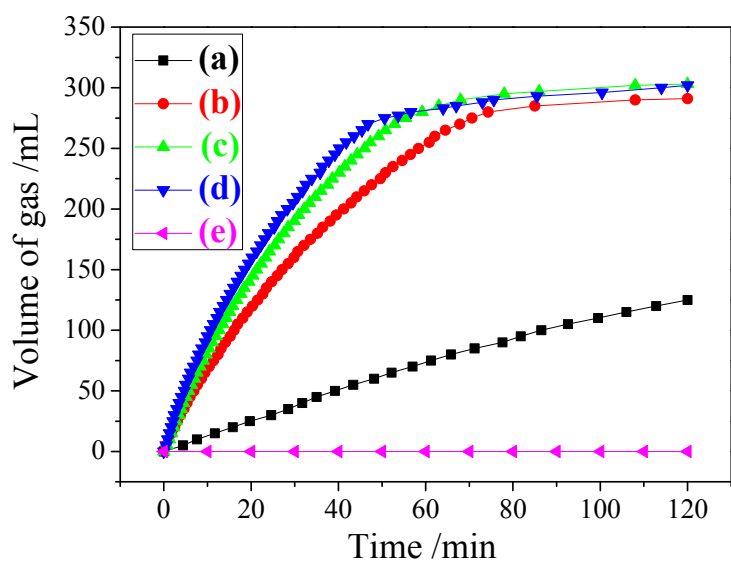

**Figure S9.** Gas generation by decomposition of FA/SF with different FA molar percents ( $n_{FA} = 5$  mmol) (a) 100%, (b) 75%, (c) 60%, (d) 50%, (e) 0% catalyzed by Ag<sub>0.1</sub>Pd<sub>0.9</sub>/rGO ( $n_{AgPd}/n_{FA} = 0.02$ ) at 298 K under ambient atmosphere.

**Table S1.** The initial TOF values calculated during the first 20 min of the reactions in the decomposition of FA catalyzed by various heterogeneous catalysts.

| Catalyst              | FA<br>(mmol) | Additive<br>(mmol) | Tem.<br>(K) | $n_{\text{catalyst}}$<br>(mmol) | TOF <sub>initial</sub><br>(mol H <sub>2</sub> · mol catalyst <sup>-1</sup> · h <sup>-1</sup> ) <sup>a</sup> | Ref.      |
|-----------------------|--------------|--------------------|-------------|---------------------------------|-------------------------------------------------------------------------------------------------------------|-----------|
| AgPd/rGO              | 5.0          | HCOONa (3.35)      | 298         | 0.100                           | 105.2                                                                                                       | This work |
| Pd- poly(allyl-amine) | 15.2         | None               | 295         | 0.040                           | 46.1                                                                                                        | 38        |
| Ag@Pd                 | 10.0         | None               | 293         | 0.200                           | 15.5                                                                                                        | 6         |
| CoAuPd/C              | 5.0          | None               | 298         | 0.100                           | 36.9                                                                                                        | 8         |

### Calculation methods:

$$x_a = \frac{P_{\text{atm}} V_{H_2} / RT}{n_{(FA+SF)}} \quad (1)$$

Where  $x_a$  is conversion,  $P_{\text{atm}}$  is the atmospheric pressure,  $V_{H_2}$  is the generated volume of H<sub>2</sub> gas within 20 min,  $R$  is the universal gas constant,  $T$  is the room temperature (298 K),  $n_{(FA+SF)}$  is the total molar number of reactants of FA and SF.

$$\text{TOF} = \frac{P_{\text{atm}} V_{H_2} / RT}{n_{\text{AgPd}} t} \quad (2)$$

Where  $V_{H_2}$  is the generated volume of H<sub>2</sub> gas within 20 min,  $n_{\text{AgPd}}$  is the molar number of AgPd catalyst,  $t$  is the reaction time (20 min) in hour.

$$R_m = \frac{n_{(FA+SF)}}{n_{FA}} \quad (3)$$

Where the  $R_m$  is the theoretical molar ratio of H<sub>2</sub> to CO<sub>2</sub> based on equations (1) and (2),  $n_{FA}$  is the molar number of FA.

### References

- S1 W. S. Hummers, R. E. Offeman, *J. Am. Chem. Soc.* 1958, **80**, 1339.  
S2 N. I. Kovtyukhova, P. J. Ollivier, B. R. Martin, T. E. Mallouk, S. A. Chizhik, E. V. Buzaneva, A. D. Gorchinskiy, *Chem. Mater.* 1999, **11**, 771.
